# Supplementary material
Source: PubMed Central journal article supplement (PMC4358763)
Supplement: NIHMS665284-supplement-SM.pdf [file NIHMS665284-supplement-SM.pdf]

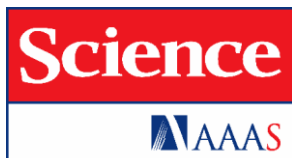

## Supplementary Materials for

### ***Sept4*/ARTS Regulates Stem Cell Apoptosis and Skin Regeneration**

Yaron Fuchs, Samara Brown, Travis Gorenc, Joe Rodriguez, Elaine Fuchs,\* Hermann Steller\*

\*Corresponding author. E-mail: [steller@rockefeller.edu](mailto:steller@rockefeller.edu) (H.S.); [fuchslb@rockefeller.edu](mailto:fuchslb@rockefeller.edu) (E.F.)

Published 20 June 2013 on *Science* Express  
DOI: 10.1126/science.1233029

#### **This PDF file includes:**

Materials and Methods

Figs. S1 to S10

References

## **Materials and methods**

### **Mice**

*Sept4*/ARTS<sup>-/-</sup>, XIAP<sup>-/-</sup> and XIAP<sup>ΔRING</sup> were described previously (7, 25, 32). *Tg(Krt1-15-EGFP)2Cot/J*, *Tg(Krt1-15-cre/PGR)22Cot* and *Rosa26-YFP* mice were purchased from Jackson.

### **Flow cytometry**

HFSC isolation and FACS analysis was performed with K15-GFP and CD34, Integrin α6, Integrin β1 and Sca1 antibodies as previously described (33, 34). HFSCs as well as Sca-1<sup>+</sup> keratinocytes were isolated from the backskin of 8-week-old mice (telogen).

### **Histology and Immunofluorescence**

Skins were embedded in OCT, frozen, sectioned, and fixed in 4% formaldehyde. For paraffin sections, skins were incubated in 4% formaldehyde at 4°C overnight, dehydrated with a series of increasing concentrations of ethanol and xylene, and embedded in paraffin. Paraffin sections were rehydrated using W-CAP (Bio-optica) and subjected to immunofluorescence microscopy. For immunohistochemistry, sections were subjected to antigen unmasking in 10 mM Citrate, pH 6.0. Sections were incubated with HRP conjugate secondary antibodies (Abs) followed by the HRP substrate, diaminobenzidine. Antibodies and dilutions are included in Supplemental Data. Tail samples of hair follicles were treated with 5mM EDTA for 4 hours at 37<sup>0</sup>C to separate skin epithelium from dermis and fixed in formal saline for 2 hours in room temperature. DWMs were performed as in (35).

### **RT-PCR analysis**

RT-PCR was performed using Express SYBR greener (Invitrogen). *Sept4* primers were previously described in (12).

### **Bulge stem cell culture, cell number and apoptosis assays**

CD34<sup>+</sup> bulge cells were isolated and cultured on mitomycin C-treated J2 3T3 fibroblasts. For assessing cellular expansion 10<sup>4</sup> freshly isolated cells were plated into 35-mm plates. The numbers of colonies (>4 cells) and cell number counted two weeks post plating. For apoptotic

assays, CD34<sup>+</sup> bulge cells were plated on fibronectin coated cover slips in transwell in which the upper portion contains the J2 3T3 feeders. Transwells were utilized in order to sustain and easily monitor the CD34<sup>+</sup> cells prior to apoptotic stimuli. Two days post plating STS (1 $\mu$ M) and Eto (50  $\mu$ M) were added for 2 hours or 14 hours, respectively. Cells were then fixed with 4% PFA and subjected to Immunofluorescence microscopy.

### **Wound repair and Cre induction**

For all wound repair experiments, mice were sedated with ketamine/xylazine (5 $\mu$ g/g) administered by intraperitoneal injection. Mice were shaved and excision wounds were performed by punch biopsy extraction of 1cm<sup>2</sup> dorsal-skin. PWI, mice were individually housed. At the desired time PWI, mice were euthanized with CO<sub>2</sub> and the wounded skins were harvested and placed in 4% paraformaldehyde for paraffin embedding or OCT. Cre<sup>PGR</sup> was induced by topical application of RU486 (1% Sigma) dissolved in ethanol for 5 consecutive days.

### **Statistical analyses**

All quantification data are mean  $\pm$ SD. The significance of quantitative data was tested employing student T test.

### **Antibody Information**

ARTS (Rabbit, 1:100, Sigma), CD34 (Rat, 1:100, ebioscience), K15 (Mouse, 1:100, Thermo, Chicken, 1:1000, Abcam), Sox9 (Rabbit, 1:100, Millipore, Goat, 1:50, Santa Cruz), Lgr6 (Rabbit, 1:200, Novus), Integrin  $\alpha$ 6 (Rat, 1:400, ebioscience), Integrin  $\beta$ 1 (Hamster, 1:400, ebioscience), Sca1 (Mouse, 1:200, ebioscience), Cleaved-Caspase-3 (Rabbit, 1:100, Cell signaling), Cleaved-Caspase-7 (Rabbit, 1:100, Cell signaling), Cleaved-Caspase-9 (Rabbit, 1:100, Cell signaling), NFATc1 (Mouse, 1:100, Santa Cruz, Rabbit, 1:50, Abcam), TBX1 (Rabbit, 1:50, Abcam) PCNA (Rabbit, 1:100, Santa Cruz, Mouse, 1:100, Novus), Ki67 (Rabbit, 1:1000, Abcam), XIAP (Rabbit, 1:100, Santa Cruz), Lhx2 (Goat, 1:100, Santa Cruz), Tcf3 (Rabbit, 1:100, Santa Cruz, Rabbit, 1:100, Novus). TUNEL was performed using ApopTag TdT (Millipore).

## Supplementary Figures

**Figure S1. ARTS is expressed in the skin and regulates the number of HFSCs.** **A Left panel.** Immunofluorescence (IF) of telogen-phase (P20) skin sections with ARTS, CD34 and K15 antibodies. **A Right panel.** IF on TWM indicating ARTS antibody specificity **B.** Anti-ARTS immunohistochemistry (IHC) of anagen-phase (P14) HF from WT and *Sept4/ARTS*<sup>-/-</sup> mice. Immunolabeling for ARTS was detected in HFSCs, the HG, and the ORS cells of anagenic HF. **C.** RT-PCR analysis of *Sept4* transcripts expressed in CD34<sup>+</sup> HFSCs. HFSC *Sept4* expression levels were normalized to brain transcripts (top) and examined by gel electrophoresis (bottom). Lanes: CD34<sup>+</sup>Sca1<sup>-</sup> HFSCs (1), Brain (2), *Sept4/ARTS*<sup>-/-</sup> CD34<sup>+</sup>Sca1<sup>-</sup> HFSCs (3) and no template control (4). ARTS was the only *Sept4* transcript detectable in HFSCs indicating that it is the predominant if not the only splice variant expressed in these cells. **D.** Cells were first sorted for  $\alpha 6^{+}\beta 1^{+}$  and then resorted for CD34<sup>+</sup>Sca1<sup>-</sup>. The percentage of CD34<sup>+</sup>Sca1<sup>-</sup> HFSCs was calculated from the  $\alpha 6^{+}\beta 1^{+}$  population. Depicted is the percentage of CD34<sup>+</sup> $\alpha 6^{\text{hi}}$  and CD34<sup>+</sup> $\alpha 6^{\text{low}}$  cells. Average of WT CD34<sup>+</sup>Sca1<sup>-</sup> HFSCs is 6.04±1.9% and *Sept4/ARTS*<sup>-/-</sup> 12.65%±2.47% (n≥11, P<0.001). Scale Bars: 10µm (B), 20µm (A Left), 200µm (A Right).

**Figure S2. *Sept4/ARTS*<sup>-/-</sup> mice display an increased number of HFSCs.** **A, B.** Percentage of HF with extended ES (**A**) and length of bulge length and epithelial stand (**B**). **C, D.** Z-stack of whole mount telogen phase tailskins stained for HFSC markers K15 (**C**) and CD34 (**D**) (8-week-old mice). Scale Bars: 200µm. \*\*\* Indicates P<0.001.

**Figure S3. *Sept4/ARTS* does not affect proliferation.** **A-D.** Number of colonies (>4 cells) and fold increase of CD34<sup>+</sup>Sca1<sup>-</sup> HFSCs and CD34<sup>-</sup>Sca1<sup>+</sup> epidermal keratinocytes plated. Data are representative of three independent experiments. **E-G.** *Sept4/ARTS* does not affect proliferation *in vivo*. Quantification of the number of Ki67<sup>+</sup> bulge cells (**E**), Ki67<sup>+</sup>/K15<sup>+</sup> epidermal cells (**F**) and proliferation in different skin compartments (**G**) (P21). **H.** Confocal DHW images of proliferating cells in the different skin compartments (P21). INF denotes infundibulum and IFE-interfollicular epidermis **I-K.** *Sept4/ARTS* does not affect proliferation *in vitro*. **I.** Confocal image of Ki67<sup>+</sup> and control non-proliferating CD34<sup>+</sup> cells. **J, K.** Quantification of the number of Ki67<sup>+</sup> (**J**) and PCNA<sup>+</sup> (**K**) CD34<sup>+</sup> cells. Scale Bars: 5µm (I) 50µm (H). \*\*\* Indicates P<0.001.

**Figure S4. *Sept4*/*ARTS*<sup>-/-</sup> HFSCs are resistant to apoptosis.** **A.** Schematic of the new bulge (NB), old bulge (OB), hair germ (HG) and dermal papilla (DP) during second telogen. **B.** IF on dorsal whole mounts (P50) indicating that *Sept4*/*ARTS*<sup>-/-</sup> HFSCs form two bulges as WT mice do. **B. right panel.** Analyses of the numbers of K15-GFP<sup>+</sup> HFSCs within the old and new bulges of WT and *Sept4*/*ARTS*<sup>-/-</sup> HFSCs. **C.** Percentage of HFSCs that encompass K15<sup>+</sup>/CP3<sup>+</sup> cells (P16). Outside the bulge, ~75% of WT HFSCs had at least one K15<sup>+</sup>/CP3<sup>+</sup> cell in the upper/mid ORS while *Sept4*/*ARTS*<sup>-/-</sup> HFSCs showed staining in only 1-2%. **D.** Immunofluorescence staining of dorsalskin HFSCs, demonstrating K15<sup>+</sup>/CP3<sup>+</sup> and K15<sup>+</sup>/Sox9<sup>+</sup>/TUNEL<sup>+</sup> cells (P16). The data shown in B and C indicate that loss of *Sept4*/*ARTS* causes a striking decrease in apoptosis. **E. upper panels.** Immunofluorescence staining of tailskin HFSCs, demonstrating that deletion of *Sept4*/*ARTS* causes increased resistance of bulge cells towards apoptosis. **E lower panel left.** CP3<sup>+</sup> cells are TUNEL positive. **E lower panel right.** Enlargement of apoptotic HFSCs, demonstrating apoptotic morphology such as membrane blebbing. Scale Bars: 5μm (E lower panels), 20μm (B, D) and 100μm (E upper panels) \*\*\* Indicates P<0.001.

**Figure S5. CD34<sup>+</sup> HFSCs can be grown without sustaining feeders.** *Sept4*/*ARTS*<sup>-/-</sup> and control CD34<sup>+</sup> HFSCs were grown without sustaining J2 feeder cells on either fibronectin- or collagen-coated plates. **A.** Bright field photographs of cells two weeks post plating. **B.** Fold increase in CD34<sup>+</sup> cell number of cells plated on fibronectin coated plates. *Sept4*/*ARTS*<sup>-/-</sup> HFSCs reached confluence under conditions that severely hindered the growth of control cells, indicating that they are protected from stress in the absence of feeder cells. Scale bar indicates 500μm. \*\*\* Indicates P>0.001

**Figure S6. Loss of *Sept4*/*ARTS* function accelerates wound healing and improves skin regeneration.** **A.** Pictures of 8-week-old mice, 5 days PWI. Dashed line represents wound border. **B.** Immunofluorescence for PCNA, indicating proliferative activity within the regenerated HF niche in *Sept4*/*ARTS*<sup>-/-</sup> mice. Proliferating cells were predominantly positioned along the leading edge of regenerating HFSCs and, in this regard, resembled WT HFSCs (18). Scale Bar: 10μm.

**Figure S7. An increased number of YFP<sup>+</sup> cells in the hair follicle and wounded epidermis of**

***Sept4/ARTS*<sup>-/-</sup> mice.** Reporter expression was induced in *Tg(Krt1-15-cre/PGR)22Cot;Rosa26-YFP; Sept4/ARTS*<sup>-/-</sup> and control mice for 5 consecutive days with RU486 from P20-P25 or P45-P50, and wounding was executed at P26 or P56. Skins were analyzed for YFP with/without HFSC markers at t=0d (**A, B**), 7d (**C, D**) and 18d-PWI (**E, F**). **G.** Zoom-in on regenerated HF in *Sept4/ARTS*<sup>-/-</sup> mice 18d-PWI. Dashed line indicates dermis-epidermis border. Eighteen days PWI, both regenerated HFs and sebaceous glands in the wound bed of P74 *Sept4/ARTS*<sup>-/-</sup> skins still displayed YFP<sup>+</sup> cells. Scale Bars: 20 μm (A, B, E), 50 μm (G) 100μm (C, D, F).

**Figure S8. XIAP is expressed primarily in the HFSC niche, dermal papilla and sebaceous gland.** **A.** IF staining employing XIAP antibody was performed on skin section excised from the back K15-GFP reporter mice (P14) **B.** XIAP expression in the dermal papilla (DP; P14). **C.** During telogen (P20) XIAP can be witnessed in the HFSC niche as well as in the sebaceous gland. Scale Bar: 200μm (A) and 50μm (B,C).

**Figure S9. Figure S8. XIAP is regulated by and epistatic to *Sept4/ARTS*.**

**A.** Western blot demonstrating increased XIAP protein levels in *Sept4/ARTS*<sup>-/-</sup> HFSCs. Densitometry was performed using GelquantNET software **B.** H&E staining of full thickness excision wounds inflicted on 15-week old male mice. Seven days PWI, mice were euthanized and wounds were harvested. Arrows indicate regenerated HFs. Dashed line indicates dermis-neoepidermis border. Denotation: NE- neoepidermis and GT- wound granulation tissue. Scale Bar: 100μm.

**Figure S10. Deletion of XIAP suppresses *Sept4/ARTS* phenotypes in the skin and affects HFSC apoptosis.** **A.** Survival of *Sept4/ARTS*<sup>-/-</sup> CD34<sup>+</sup> HFSCs is mediated by XIAP and its RING domain. WT, *Sept4/ARTS*<sup>-/-</sup>, *XIAP*<sup>-/-</sup>, *SX*<sup>-/-</sup> and *SX*<sup>ΔRING</sup> CD34<sup>+</sup> HFSCs were grown without sustaining J2 feeder cells on fibronectin-covered plates. In contrast to *Sept4/ARTS*<sup>-/-</sup> HFSCs, which exhibited a dramatic increase in cell number, the growth of *SX*<sup>-/-</sup> and *SX*<sup>ΔRING</sup> SCs was impaired even more severely than the growth of WT control cells. **A.** Bright field photographs of cells two weeks post plating. **B.** Fold increase in (CD34<sup>+</sup> plated) cell number. **C, D** IF of (CD34<sup>+</sup> plated) HFSCs for cleaved-caspase 7 (CP7, **C**) and cleaved-caspase 9 (CP9, **D**) demonstrating decreased number in *Sept4/ARTS*<sup>-/-</sup> and increased number in *XIAP*<sup>-/-</sup> HFSCs.

Scale Bar: 500 $\mu$ m. (\*\*\*) Indicates  $P > 0.001$ ).

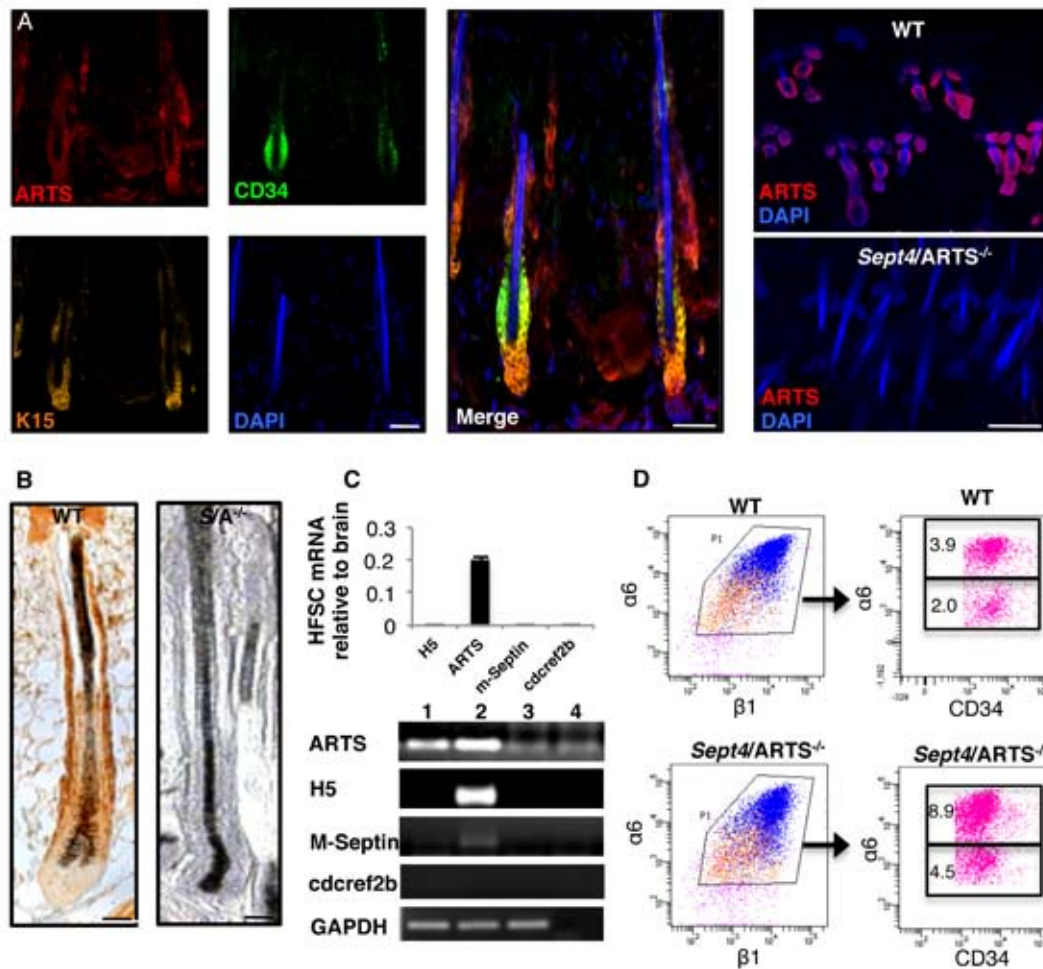

Figure S1. ARTS is expressed in the skin and regulates the number of HFSCs.



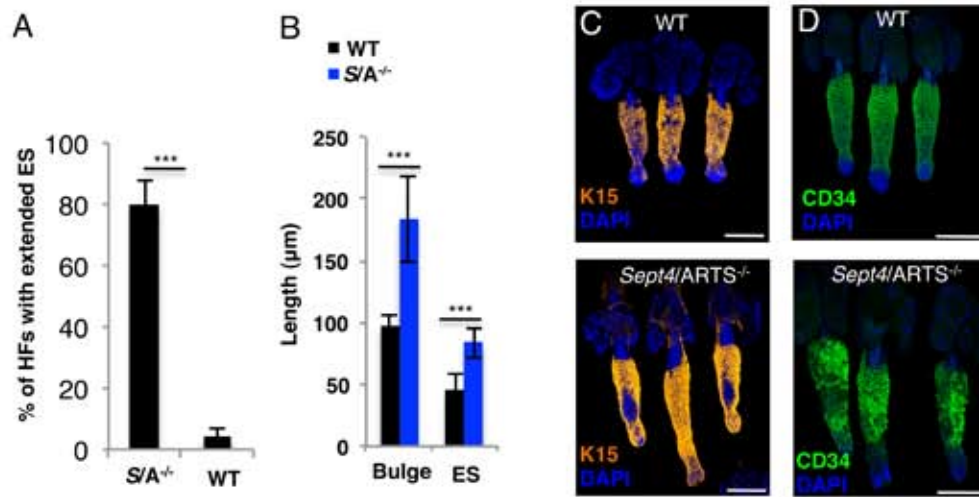

**Figure S2.** *Sept4*/*ARTS*<sup>-/-</sup> mice display increased bulge and ES size.

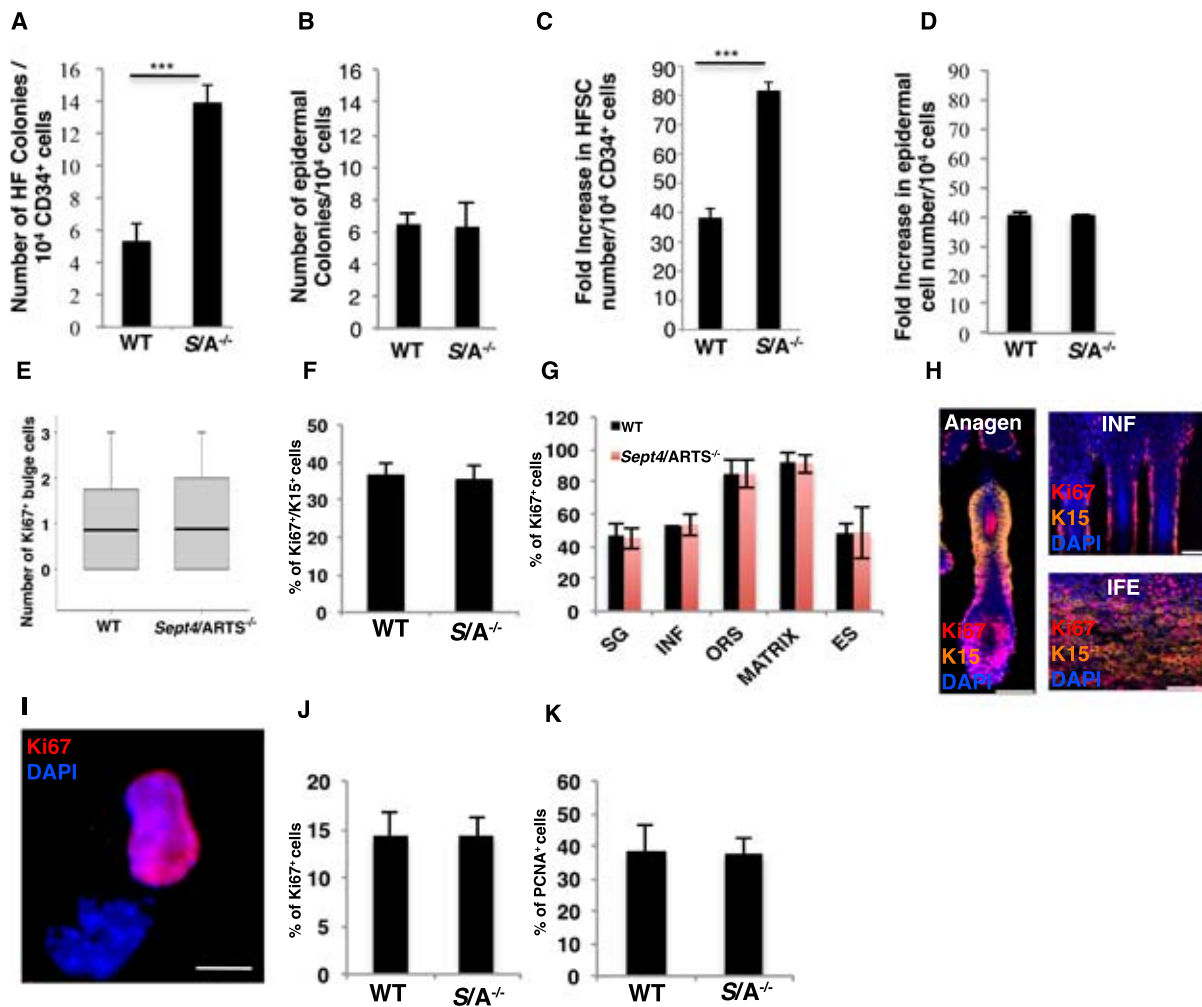

Figure S3. *Sept4/ARTS* does not affect proliferation.

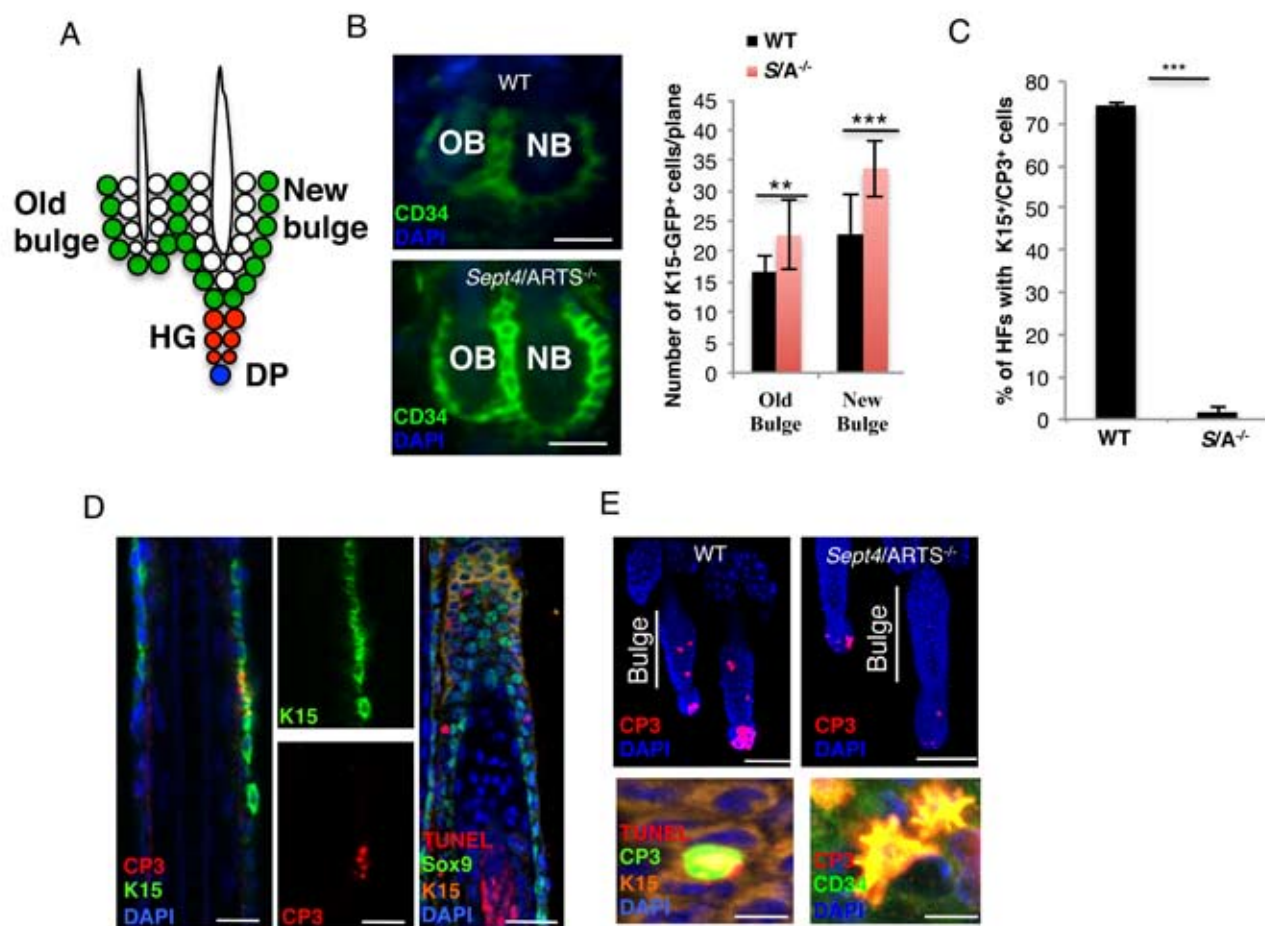

**Figure S4. *Sept4/ARTS<sup>-/-</sup>* HFSCs are resistant to apoptosis.**

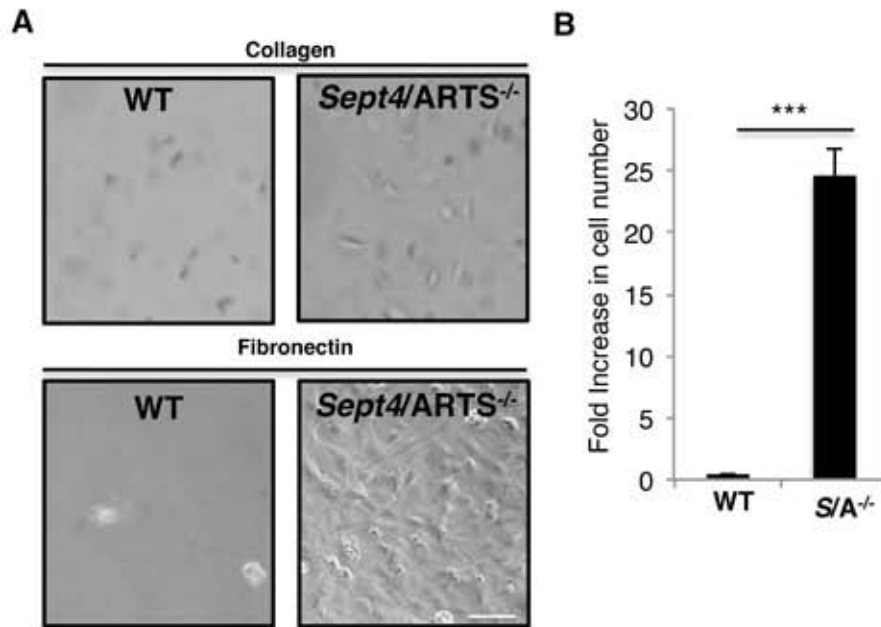

Figure S5. CD34<sup>+</sup> HFSCs can be grown without sustaining feeders.

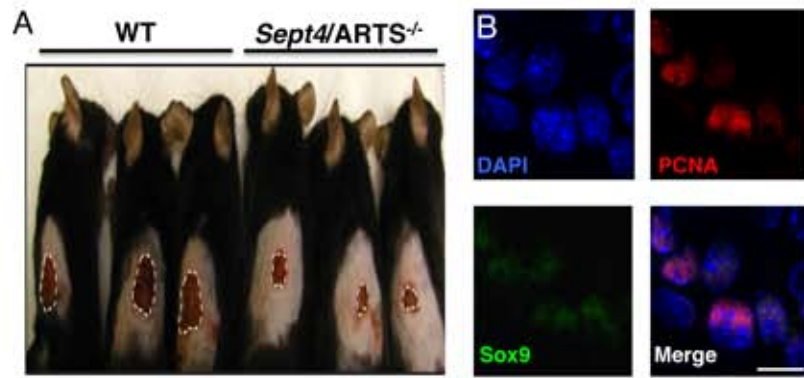

**Figure S6. Loss of *Sept4/ARTS* function accelerates wound healing and improves regeneration of HFs.**

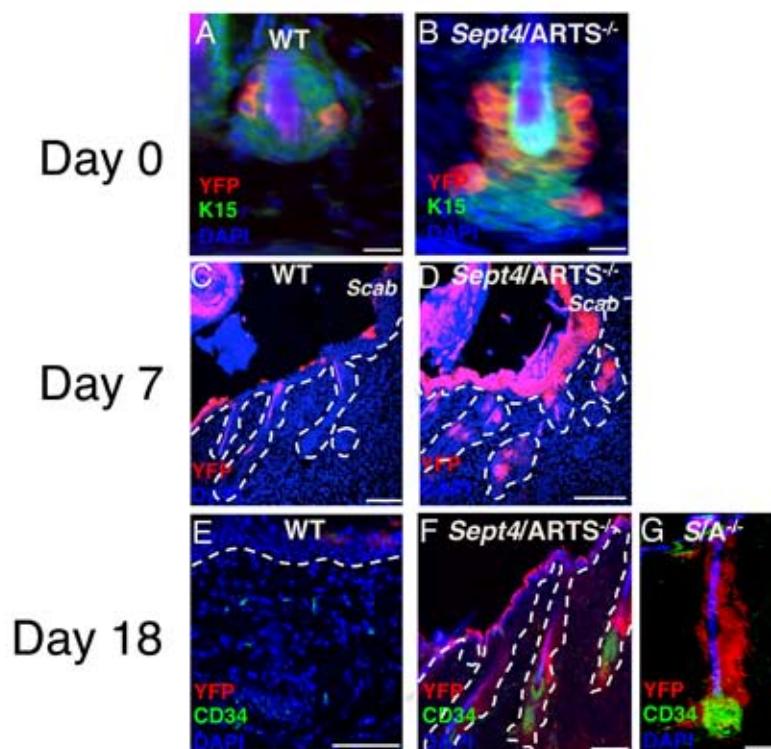

Figure S7. An increased number of YFP+ cells in the hair follicle and wounded epidermis of *Sept4/ARTS<sup>-/-</sup>* mice.

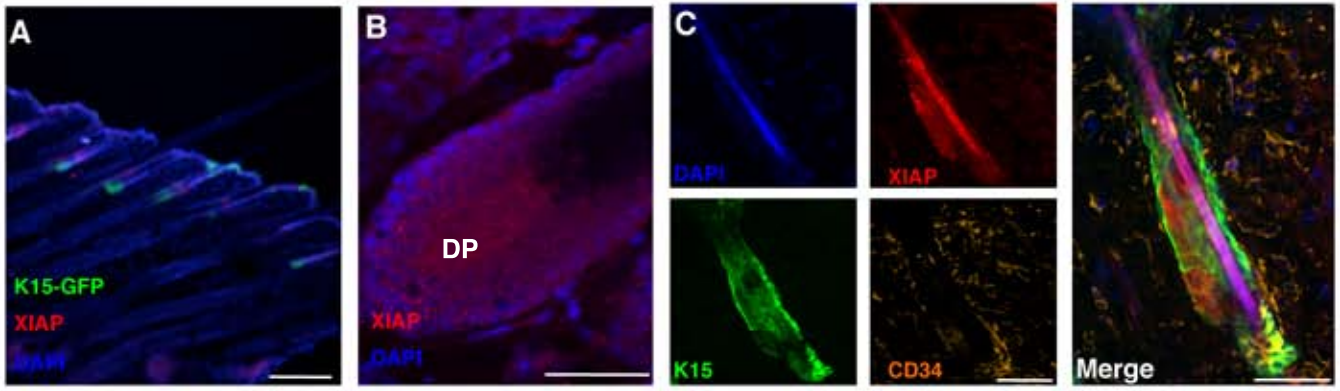

**Figure S8. XIAP is expressed primarily in the HFSC niche, dermal papilla and sebaceous gland.**

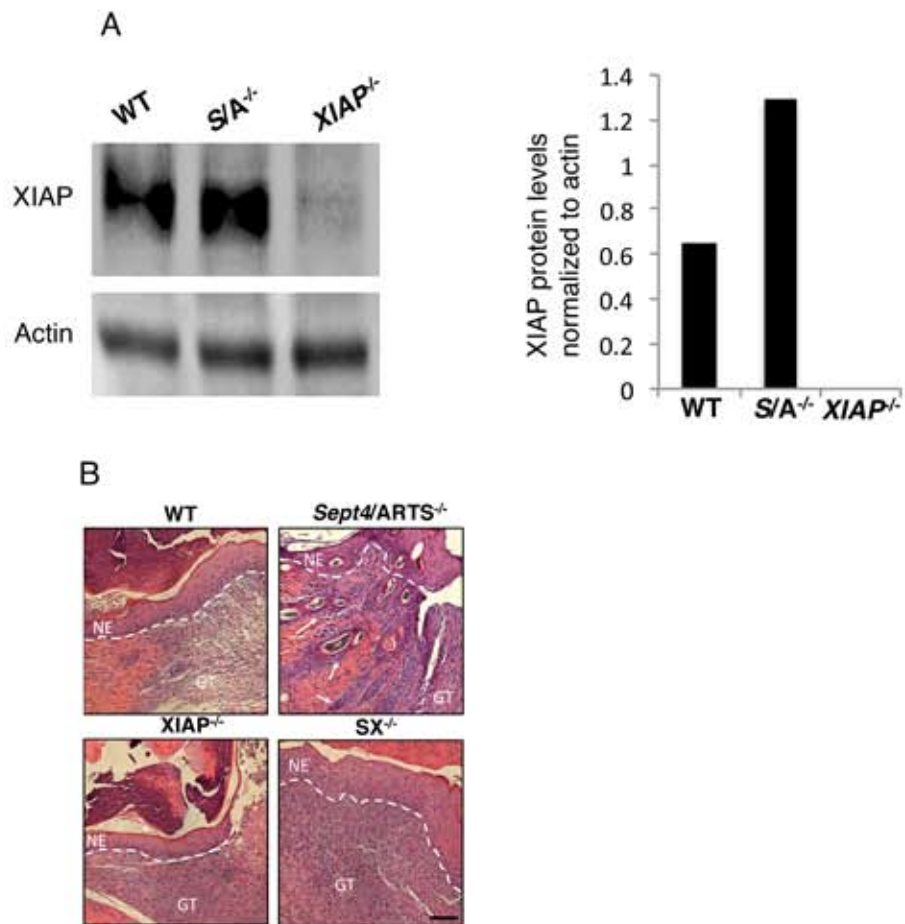

**Figure S9. XIAP is regulated by and epistatic to *Sept4/ARTS*.**



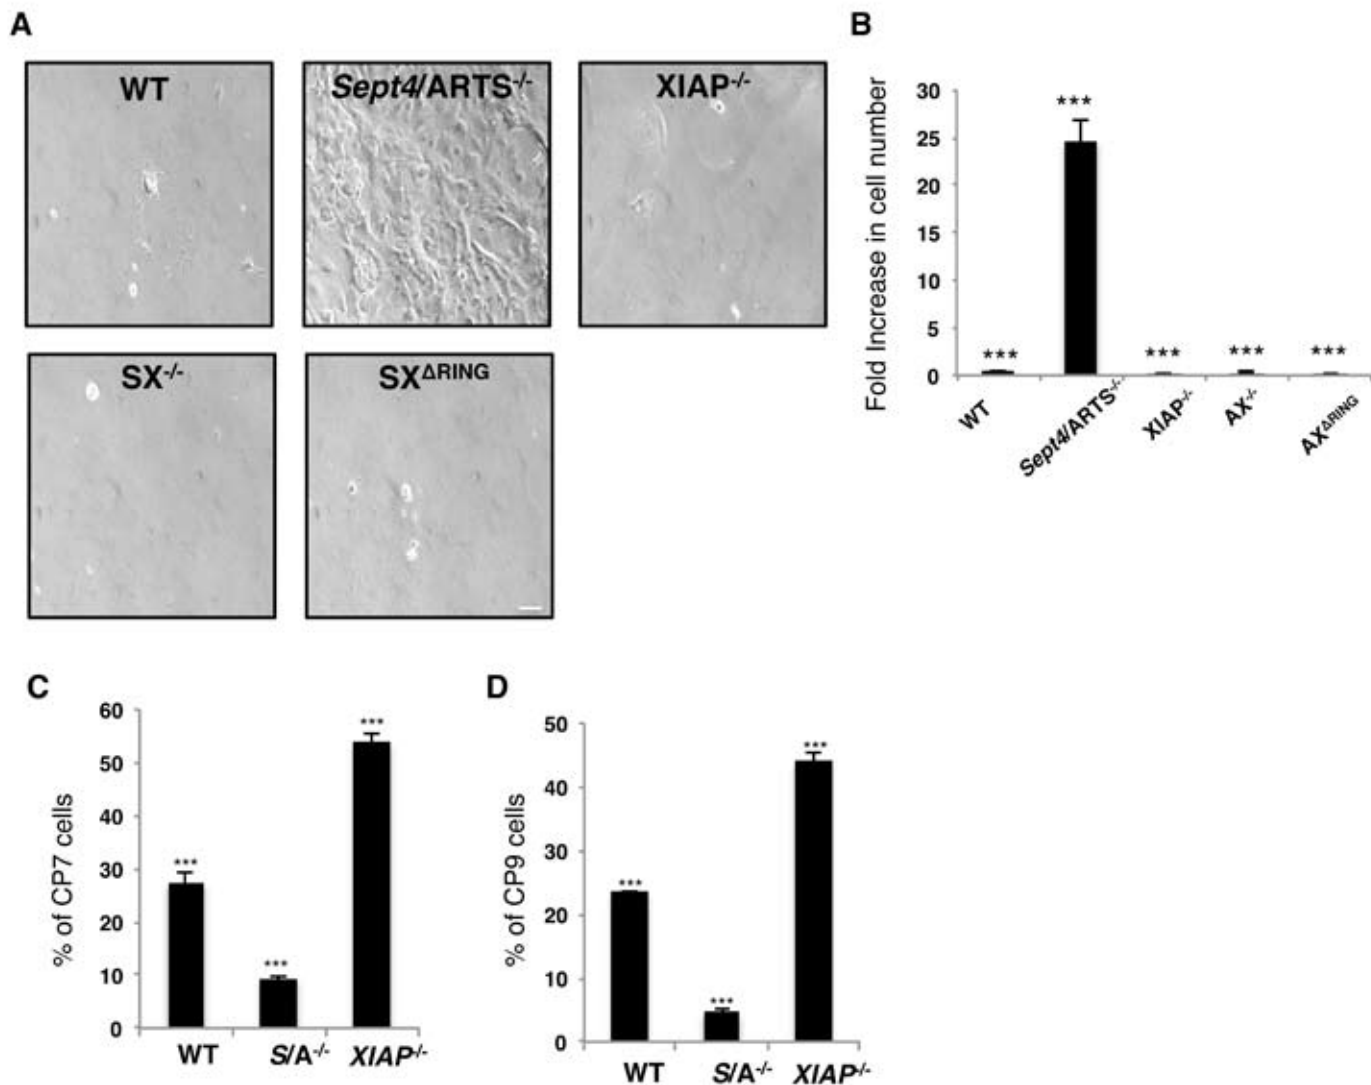

**Figure S10. Deletion of XIAP suppresses *Sept4/ARTS* phenotypes in the skin and affects HFSC apoptosis.**

## References

1. I. L. Weissman, Translating stem and progenitor cell biology to the clinic: Barriers and opportunities. *Science* **287**, 1442–1446 (2000). [doi:10.1126/science.287.5457.1442](https://doi.org/10.1126/science.287.5457.1442)
2. S. Rafii, D. Lyden, Therapeutic stem and progenitor cell transplantation for organ vascularization and regeneration. *Nat. Med.* **9**, 702–712 (2003). [doi:10.1038/nm0603-702](https://doi.org/10.1038/nm0603-702) [Medline](#)
3. Y. C. Hsu, E. Fuchs, A family business: Stem cell progeny join the niche to regulate homeostasis. *Nat. Rev. Mol. Cell Biol.* **13**, 103–114 (2012). [doi:10.1038/nrm3272](https://doi.org/10.1038/nrm3272) [Medline](#)
4. Y. Fuchs, H. Steller, Programmed cell death in animal development and disease. *Cell* **147**, 742–758 (2011). [doi:10.1016/j.cell.2011.10.033](https://doi.org/10.1016/j.cell.2011.10.033) [Medline](#)
5. M. Gyrð-Hansen, P. Meier, IAPs: From caspase inhibitors to modulators of NF- $\kappa$ B, inflammation and cancer. *Nat. Rev. Cancer* **10**, 561–574 (2010). [doi:10.1038/nrc2889](https://doi.org/10.1038/nrc2889) [Medline](#)
6. E. Kuranaga, M. Miura, Nonapoptotic functions of caspases: Caspases as regulatory molecules for immunity and cell-fate determination. *Trends Cell Biol.* **17**, 135–144 (2007). [doi:10.1016/j.tcb.2007.01.001](https://doi.org/10.1016/j.tcb.2007.01.001) [Medline](#)
7. A. J. Schile, M. García-Fernández, H. Steller, Regulation of apoptosis by XIAP ubiquitin-ligase activity. *Genes Dev.* **22**, 2256–2266 (2008). [doi:10.1101/gad.1663108](https://doi.org/10.1101/gad.1663108) [Medline](#)
8. S. Kornbluth, K. White, Apoptosis in *Drosophila*: Neither fish nor fowl (nor man, nor worm). *J. Cell Sci.* **118**, 1779–1787 (2005). [doi:10.1242/jcs.02377](https://doi.org/10.1242/jcs.02377) [Medline](#)
9. A. Bergmann, A. Y. Yang, M. Srivastava, Regulators of IAP function: Coming to grips with the grim reaper. *Curr. Opin. Cell Biol.* **15**, 717–724 (2003). [doi:10.1016/j.ceb.2003.10.002](https://doi.org/10.1016/j.ceb.2003.10.002) [Medline](#)
10. S. Larisch, Y. Yi, R. Lotan, H. Kerner, S. Eimerl, W. Tony Parks, Y. Gottfried, S. Birkey Reffey, M. P. de Caestecker, D. Danielpour, N. Book-Melamed, R. Timberg, C. S. Duckett, R. J. Lechleider, H. Steller, J. Orly, S. J. Kim, A. B. Roberts, A novel mitochondrial septin-like protein, ARTS, mediates apoptosis dependent on its P-loop motif. *Nat. Cell Biol.* **2**, 915–921 (2000). [doi:10.1038/35046566](https://doi.org/10.1038/35046566) [Medline](#)
11. Y. Gottfried, A. Rotem, R. Lotan, H. Steller, S. Larisch, The mitochondrial ARTS protein promotes apoptosis through targeting XIAP. *EMBO J.* **23**, 1627–1635 (2004). [doi:10.1038/sj.emboj.7600155](https://doi.org/10.1038/sj.emboj.7600155) [Medline](#)
12. M. García-Fernández, H. Kissel, S. Brown, T. Gorenc, A. J. Schile, S. Rafii, S. Larisch, H. Steller, Sept4/ARTS is required for stem cell apoptosis and tumor suppression. *Genes Dev.* **24**, 2282–2293 (2010). [doi:10.1101/gad.1970110](https://doi.org/10.1101/gad.1970110) [Medline](#)

13. E. Fuchs, Scratching the surface of skin development. *Nature* **445**, 834–842 (2007).  
[doi:10.1038/nature05659](https://doi.org/10.1038/nature05659) [Medline](#)
14. S. J. Morrison, A. C. Spradling, Stem cells and niches: Mechanisms that promote stem cell maintenance throughout life. *Cell* **132**, 598–611 (2008). [doi:10.1016/j.cell.2008.01.038](https://doi.org/10.1016/j.cell.2008.01.038) [Medline](#)
15. C. A. Jahoda, A. M. Christiano, Niche crosstalk: Intercellular signals at the hair follicle. *Cell* **146**, 678–681 (2011). [doi:10.1016/j.cell.2011.08.020](https://doi.org/10.1016/j.cell.2011.08.020) [Medline](#)
16. W. M. Woo, A. E. Oro, Hair follicle stem cells. *Cell* **146**, 334 (2011). [doi:10.1016/j.cell.2011.07.001](https://doi.org/10.1016/j.cell.2011.07.001)
17. R. J. Morris, Y. Liu, L. Marles, Z. Yang, C. Trempus, S. Li, J. S. Lin, J. A. Sawicki, G. Cotsarelis, Capturing and profiling adult hair follicle stem cells. *Nat. Biotechnol.* **22**, 411–417 (2004).  
[doi:10.1038/nbt950](https://doi.org/10.1038/nbt950) [Medline](#)
18. Y. C. Hsu, H. A. Pasolli, E. Fuchs, Dynamics between stem cells, niche, and progeny in the hair follicle. *Cell* **144**, 92–105 (2011). [doi:10.1016/j.cell.2010.11.049](https://doi.org/10.1016/j.cell.2010.11.049) [Medline](#)
19. S. Müller-Röver, B. Handjiski, C. van der Veen, S. Eichmüller, K. Foitzik, I. A. McKay, K. S. Stenn, R. Paus, A comprehensive guide for the accurate classification of murine hair follicles in distinct hair cycle stages. *J. Invest. Dermatol.* **117**, 3–15 (2001). [doi:10.1046/j.0022-202x.2001.01377.x](https://doi.org/10.1046/j.0022-202x.2001.01377.x) [Medline](#)
20. M. Ito, Y. Liu, Z. Yang, J. Nguyen, F. Liang, R. J. Morris, G. Cotsarelis, Stem cells in the hair follicle bulge contribute to wound repair but not to homeostasis of the epidermis. *Nat. Med.* **11**, 1351–1354 (2005).  
[doi:10.1038/nm1328](https://doi.org/10.1038/nm1328) [Medline](#)
21. I. Brownell, E. Guevara, C. B. Bai, C. A. Loomis, A. L. Joyner, Nerve-derived sonic hedgehog defines a niche for hair follicle stem cells capable of becoming epidermal stem cells. *Cell Stem Cell* **8**, 552–565 (2011). [doi:10.1016/j.stem.2011.02.021](https://doi.org/10.1016/j.stem.2011.02.021) [Medline](#)
22. M. Ito, Z. Yang, T. Andl, C. Cui, N. Kim, S. E. Millar, G. Cotsarelis, Wnt-dependent de novo hair follicle regeneration in adult mouse skin after wounding. *Nature* **447**, 316–320 (2007). [doi:10.1038/nature05766](https://doi.org/10.1038/nature05766)  
[Medline](#)
23. J. C. Reed, Apoptosis-targeted therapies for cancer. *Cancer Cell* **3**, 17–22 (2003). [doi:10.1016/S1535-6108\(02\)00241-6](https://doi.org/10.1016/S1535-6108(02)00241-6) [Medline](#)
24. E. C. LaCasse, D. J. Mahoney, H. H. Cheung, S. Plenchette, S. Baird, R. G. Korneluk, IAP-targeted therapies for cancer. *Oncogene* **27**, 6252–6275 (2008). [doi:10.1038/onc.2008.302](https://doi.org/10.1038/onc.2008.302) [Medline](#)
25. H. Harlin, S. B. Reffey, C. S. Duckett, T. Lindsten, C. B. Thompson, Characterization of XIAP-deficient mice. *Mol. Cell. Biol.* **21**, 3604–3608 (2001). [doi:10.1128/MCB.21.10.3604-3608.2001](https://doi.org/10.1128/MCB.21.10.3604-3608.2001) [Medline](#)

26. W. H. Lien, X. Guo, L. Polak, L. N. Lawton, R. A. Young, D. Zheng, E. Fuchs, Genome-wide maps of histone modifications unwind in vivo chromatin states of the hair follicle lineage. *Cell Stem Cell* **9**, 219–232 (2011). [doi:10.1016/j.stem.2011.07.015](https://doi.org/10.1016/j.stem.2011.07.015) [Medline](#)
27. J. B. Garrison, R. G. Correa, M. Gerlic, K. W. Yip, A. Krieg, C. M. Tample, R. Shi, K. Welsh, S. Duggineni, Z. Huang, K. Ren, C. Du, J. C. Reed, ARTS and Siah collaborate in a pathway for XIAP degradation. *Mol. Cell* **41**, 107–116 (2011). [doi:10.1016/j.molcel.2010.12.002](https://doi.org/10.1016/j.molcel.2010.12.002) [Medline](#)
28. N. Edison, D. Zuri, I. Maniv, B. Bornstein, T. Lev, Y. Gottfried, S. Kemeny, M. Garcia-Fernandez, J. Kagan, S. Larisch, The IAP-antagonist ARTS initiates caspase activation upstream of cytochrome C and SMAC/Diablo. *Cell Death Differ.* **19**, 356–368 (2012). [doi:10.1038/cdd.2011.112](https://doi.org/10.1038/cdd.2011.112) [Medline](#)
29. S. Fulda, D. Vucic, Targeting IAP proteins for therapeutic intervention in cancer. *Nat. Rev. Drug Discov.* **11**, 109–124 (2012). [doi:10.1038/nrd3627](https://doi.org/10.1038/nrd3627) [Medline](#)
30. F. Li, Q. Huang, J. Chen, Y. Peng, D. R. Roop, J. S. Bedford, C. Y. Li, Apoptotic cells activate the “phoenix rising” pathway to promote wound healing and tissue regeneration. *Sci. Signal.* **3**, ra13 (2010). [doi:10.1126/scisignal.2000634](https://doi.org/10.1126/scisignal.2000634) [Medline](#)
31. A. Bergmann, H. Steller, Apoptosis, stem cells, and tissue regeneration. *Sci. Signal.* **3**, re8 (2010). [doi:10.1126/scisignal.3145re8](https://doi.org/10.1126/scisignal.3145re8) [Medline](#)
32. H. Kissel, M. M. Georgescu, S. Larisch, K. Manova, G. R. Hunnicutt, H. Steller, The Sept4 septin locus is required for sperm terminal differentiation in mice. *Dev. Cell* **8**, 353–364 (2005). [doi:10.1016/j.devcel.2005.01.021](https://doi.org/10.1016/j.devcel.2005.01.021) [Medline](#)
33. C. Blanpain, W. E. Lowry, A. Geoghegan, L. Polak, E. Fuchs, Self-renewal, multipotency, and the existence of two cell populations within an epithelial stem cell niche. *Cell* **118**, 635–648 (2004). [doi:10.1016/j.cell.2004.08.012](https://doi.org/10.1016/j.cell.2004.08.012) [Medline](#)
34. C. P. Lu, L. Polak, A. S. Rocha, H. A. Pasolli, S. C. Chen, N. Sharma, C. Blanpain, E. Fuchs, Identification of stem cell populations in sweat glands and ducts reveals roles in homeostasis and wound repair. *Cell* **150**, 136–150 (2012). [doi:10.1016/j.cell.2012.04.045](https://doi.org/10.1016/j.cell.2012.04.045) [Medline](#)
35. H. Fujiwara, M. Ferreira, G. Donati, D. K. Marciano, J. M. Linton, Y. Sato, A. Hartner, K. Sekiguchi, L. F. Reichardt, F. M. Watt, The basement membrane of hair follicle stem cells is a muscle cell niche. *Cell* **144**, 577–589 (2011). [doi:10.1016/j.cell.2011.01.014](https://doi.org/10.1016/j.cell.2011.01.014) [Medline](#)
